# Supplementary material for: Interventions to increase mammography screening uptake among women living in low-income and middle-income countries: a protocol for a systematic review
Source: HighWire-hosted journal article supplement (doi:10.1136/bmjopen-2021-056901), 2022-03-01
Supplement: bmjopen-2021-056901supp001_data_supplement.pdf [file bmjopen-2021-056901supp001_data_supplement.pdf]

## Search strategy with Medline (OvidSp)

|    | Search                                     | Results |
|----|--------------------------------------------|---------|
| 1  | Mammography/                               | 30508   |
| 2  | Mammograph* screen*.tw.                    | 4324    |
| 3  | breast screen*.tw.                         | 2134    |
| 4  | low-income*.tw.                            | 31257   |
| 5  | middle-income*.tw.                         | 17290   |
| 6  | Poverty.tw.                                | 22234   |
| 7  | (africa or asia or south america).tw.      | 148619  |
| 8  | Reminder Systems/                          | 3587    |
| 9  | Patient Education as Topic/                | 86626   |
| 10 | cost* reduc*.tw.                           | 3949    |
| 11 | Cost minimization.tw.                      | 895     |
| 12 | Cost saving                                | 5851    |
| 13 | Health Services Accessibility/             | 78027   |
| 14 | barriers.tw.                               | 111761  |
| 15 | Communication/                             | 86782   |
| 16 | 1 or 2 or 3                                | 32072   |
| 17 | 4 or 5 or 6 or 7                           | 208703  |
| 18 | 8 or 9 or 10 or 11 or 12 or 13 or 14 or 15 | 353569  |
| 19 | 16 and 17 and 18                           | 173     |
| 20 | limit 19 to yr="1990 -Current"             | 173     |

## Search strategy with Medline (OvidSp)

|    | Search                                             | Results   |
|----|----------------------------------------------------|-----------|
| 1  | <b>mammography AND screening</b>                   | 25,183    |
| 2  | <b>breast AND screen*</b>                          | 80,192    |
| 3  | <b>low AND income</b>                              | 92,063    |
| 4  | <b>middle AND income</b>                           | 58,876    |
| 5  | <b>poverty</b>                                     | 63,654    |
| 6  | <b>africa OR asia</b>                              | 558,564   |
| 7  | <b>south AND america</b>                           | 81,887    |
| 8  | <b>reminders</b>                                   | 10,619    |
| 9  | <b>patient AND education</b>                       | 482,981   |
| 10 | <b>cost AND saving</b>                             | 22,294    |
| 11 | <b>cost AND minimization</b>                       | 5,663     |
| 12 | <b>cost AND reduction</b>                          | 75,344    |
| 13 | <b>health AND service AND accessibility</b>        | 7,617     |
| 14 | <b>barriers</b>                                    | 189,251   |
| 15 | <b>communication</b>                               | 632,107   |
| 16 | #1 OR #2                                           | 82,140    |
| 17 | #3 OR #4 OR #5 OR #6 OR #7                         | 765,359   |
| 18 | #8 OR #9 OR #10 OR #11 OR #12 OR #13 OR #14 OR #15 | 1,320,247 |
| 19 | #16 AND #17 AND #18                                | 876       |
| 20 | #16 AND #17 AND #18 AND [1990-2021]/py             | 872       |
